# Supplementary material for: Study of the CH3⋯H2O radical complex stabilized in helium nanodroplets
Source: Royal Society of Chemistry journal article supplement (doi:10.1039/b817484a), 2009-01-01
Supplement: b817484a.pdf [file b817484a.pdf]

## Electronic supplementary information

**Table S1.** Cartesian coordinates of optimized geometry (in Å) of CH<sub>3</sub>---HOH radical complex calculated at the MP2/aug-cc-pVTZ level of theory.

| CH <sub>3</sub> ---HOH |           |           |           |
|------------------------|-----------|-----------|-----------|
|                        | x         | y         | z         |
| 1                      | 0.664212  | -0.058152 | 0.000002  |
| 8                      | 1.615726  | 0.100374  | -0.000013 |
| 1                      | 2.001058  | -0.780302 | 0.000007  |
| 6                      | -1.718446 | 0.000679  | 0.000011  |
| 1                      | -1.876016 | -0.514300 | -0.931165 |
| 1                      | -1.876058 | -0.514170 | 0.931253  |
| 1                      | -1.528332 | 1.059856  | -0.000059 |

**Table S2.** Vibrational frequencies for the CH<sub>3</sub>---HOH complex calculated at the MP2/aug-cc-pVDZ level of theory. Vibrational frequencies of isolated CH<sub>3</sub> and H<sub>2</sub>O monomers are given as well.

| MP2/aug-cc-pVDZ                  |                                      |                                  | description                                                                 | MP2/aug-cc-pVDZ                      |       |
|----------------------------------|--------------------------------------|----------------------------------|-----------------------------------------------------------------------------|--------------------------------------|-------|
| frequency<br>(cm <sup>-1</sup> ) | intensity<br>(km mol <sup>-1</sup> ) | frequency<br>(cm <sup>-1</sup> ) |                                                                             | intensity<br>(km mol <sup>-1</sup> ) |       |
|                                  |                                      |                                  | intermolecular                                                              | isolated monomers                    |       |
| v <sub>1</sub>                   | 36.60                                | 100.00                           | CH <sub>3</sub> & H <sub>2</sub> O torsional motion about the hydrogen bond |                                      |       |
| v <sub>2</sub>                   | 77.13                                | 34.72                            | in plane wagging of CH <sub>3</sub> & concerted motion of H <sub>2</sub> O  |                                      |       |
| v <sub>3</sub>                   | 100.67                               | 8.64                             | out of plane wagging of CH <sub>3</sub>                                     |                                      |       |
| v <sub>4</sub>                   | 102.73                               | 3.80                             | van der Waals stretch                                                       |                                      |       |
| v <sub>5</sub>                   | 216.68                               | 60.44                            | in plane wagging of H <sub>2</sub> O & concerted motion of CH <sub>3</sub>  |                                      |       |
| v <sub>6</sub>                   | 316.49                               | 59.09                            | out of plane wagging of H <sub>2</sub> O                                    |                                      |       |
|                                  |                                      |                                  | intramolecular                                                              |                                      |       |
| v <sub>7</sub>                   | 564.40                               | 81.94                            | CH <sub>3</sub> out of plane bend (umbrella)                                | 494.71                               | 76.94 |
| v <sub>8</sub>                   | 1422.52                              | 2.34                             | CH <sub>3</sub> in plane bend                                               | 1424.51                              | 1.76  |
| v <sub>9</sub>                   | 1423.42                              | 1.93                             | CH <sub>3</sub> in plane bend                                               | 1424.51                              | 1.76  |
| v <sub>10</sub>                  | 1624.80                              | 43.03                            | H <sub>2</sub> O bend                                                       | 1622.30                              | 67.46 |
| v <sub>11</sub>                  | 3156.41                              | 0.25                             | CH <sub>3</sub> symmetric stretch                                           | 3165.08                              | 0.00  |
| v <sub>12</sub>                  | 3354.99                              | 0.97                             | CH <sub>3</sub> antisymmetric stretch                                       | 3364.48                              | 3.01  |
| v <sub>13</sub>                  | 3358.22                              | 1.38                             | CH <sub>3</sub> antisymmetric stretch                                       | 3364.48                              | 3.01  |
| v <sub>14</sub>                  | 3768.75                              | 57.98                            | H <sub>2</sub> O symmetric stretch                                          | 3803.30                              | 4.14  |
| v <sub>15</sub>                  | 3914.40                              | 124.27                           | H <sub>2</sub> O antisymmetric stretch                                      | 3937.52                              | 67.02 |

**Table S3.** Cartesian coordinates of optimized geometry (in Å) of higher energy CH<sub>3</sub>-  
--OHH radical complex calculated at the MP2/aug-cc-pVTZ level of theory.

| CH <sub>3</sub> ---OHH |           |           |           |
|------------------------|-----------|-----------|-----------|
|                        | x         | y         | z         |
| 6                      | -0.000080 | 1.926523  | 0.000000  |
| 1                      | -0.000129 | 0.850406  | 0.000000  |
| 1                      | 0.928479  | 2.469342  | 0.000000  |
| 1                      | -0.928592 | 2.469425  | 0.000000  |
| 8                      | -0.000080 | -1.616763 | 0.000000  |
| 1                      | 0.000684  | -2.207101 | 0.759016  |
| 1                      | 0.000684  | -2.207101 | -0.759016 |

**Table S4.** Vibrational frequencies for the higher energy CH<sub>3</sub>---OHH radical complex  
calculated at both the MP2/aug-cc-pVDZ and MP2/aug-cc-pVTZ level of theory.

|                 | MP2/aug-cc-pVDZ                  |                                      | MP2/aug-cc-pVTZ                  |                                      |
|-----------------|----------------------------------|--------------------------------------|----------------------------------|--------------------------------------|
|                 | frequency<br>(cm <sup>-1</sup> ) | intensity<br>(km mol <sup>-1</sup> ) | frequency<br>(cm <sup>-1</sup> ) | intensity<br>(km mol <sup>-1</sup> ) |
| intermolecular  |                                  |                                      |                                  |                                      |
| v <sub>1</sub>  | 18.41                            | 228.91                               | 17.03                            | 61.11                                |
| v <sub>2</sub>  | 33.03                            | 64.06                                | 33.01                            | 225.37                               |
| v <sub>3</sub>  | 58.64                            | 0.00                                 | 60.86                            | 0.00                                 |
| v <sub>4</sub>  | 100.49                           | 0.51                                 | 90.40                            | 0.45                                 |
| v <sub>5</sub>  | 107.02                           | 0.38                                 | 98.35                            | 0.49                                 |
| v <sub>6</sub>  | 234.37                           | 0.68                                 | 208.06                           | 2.10                                 |
| intramolecular  |                                  |                                      |                                  |                                      |
| v <sub>7</sub>  | 548.35                           | 78.16                                | 529.70                           | 77.71                                |
| v <sub>8</sub>  | 1426.64                          | 0.86                                 | 1438.20                          | 1.10                                 |
| v <sub>9</sub>  | 1437.60                          | 0.91                                 | 1451.13                          | 1.09                                 |
| v <sub>10</sub> | 1623.35                          | 64.67                                | 1628.48                          | 68.66                                |
| v <sub>11</sub> | 3156.41                          | 10.79                                | 3164.85                          | 9.87                                 |
| v <sub>12</sub> | 3354.17                          | 5.84                                 | 3354.37                          | 3.90                                 |
| v <sub>13</sub> | 3361.52                          | 2.39                                 | 3358.14                          | 3.10                                 |
| v <sub>14</sub> | 3800.76                          | 5.22                                 | 3819.45                          | 6.93                                 |
| v <sub>15</sub> | 3934.96                          | 71.55                                | 3945.30                          | 79.68                                |
